# Supplementary material
Source: publisher figshare collection journal article supplement (https://frontiersin.figshare.com/ndownloader/files/13533107)

annotation  
gene  
transcript  
CpG island

data  
RNA-seq v2 (log2)  
infinium 450k  
slide/clinical data  
missing data

statistics  
p Wilcoxon rank-sum test  
p < 0.05 p ≥ 0.05  
r Pearson correlation  
\*\*\* p < 0.001  
\*\* p < 0.01  
\* p < 0.05  
p ≥ 0.05

BRCA subtype  
Normal  
Basal  
Her2  
LumA  
LumB  
sample type  
primary solid tumor  
metastatic  
solid tissue normal

FIZ1, EXPRESSION, BRCA DATA SET

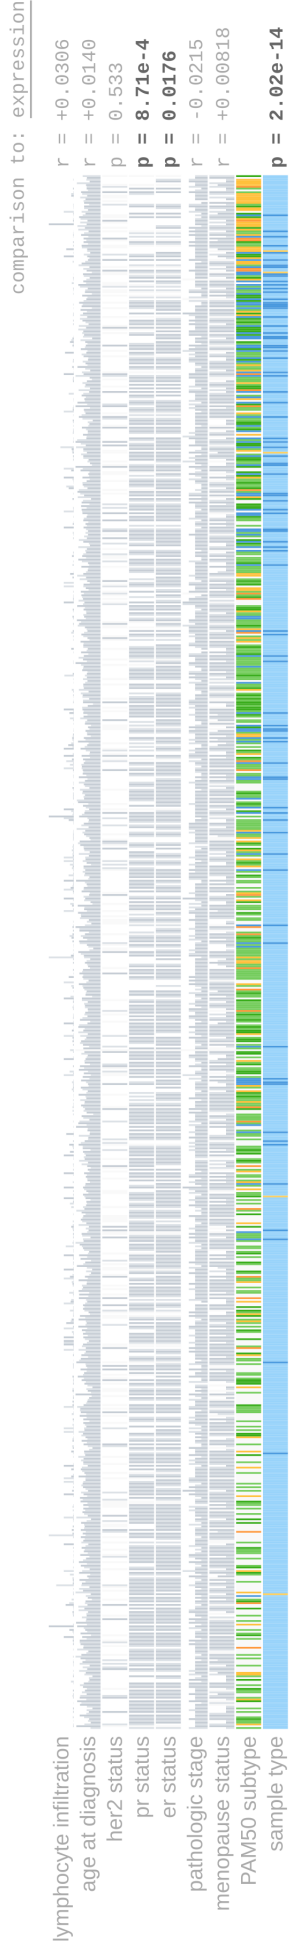

► expression

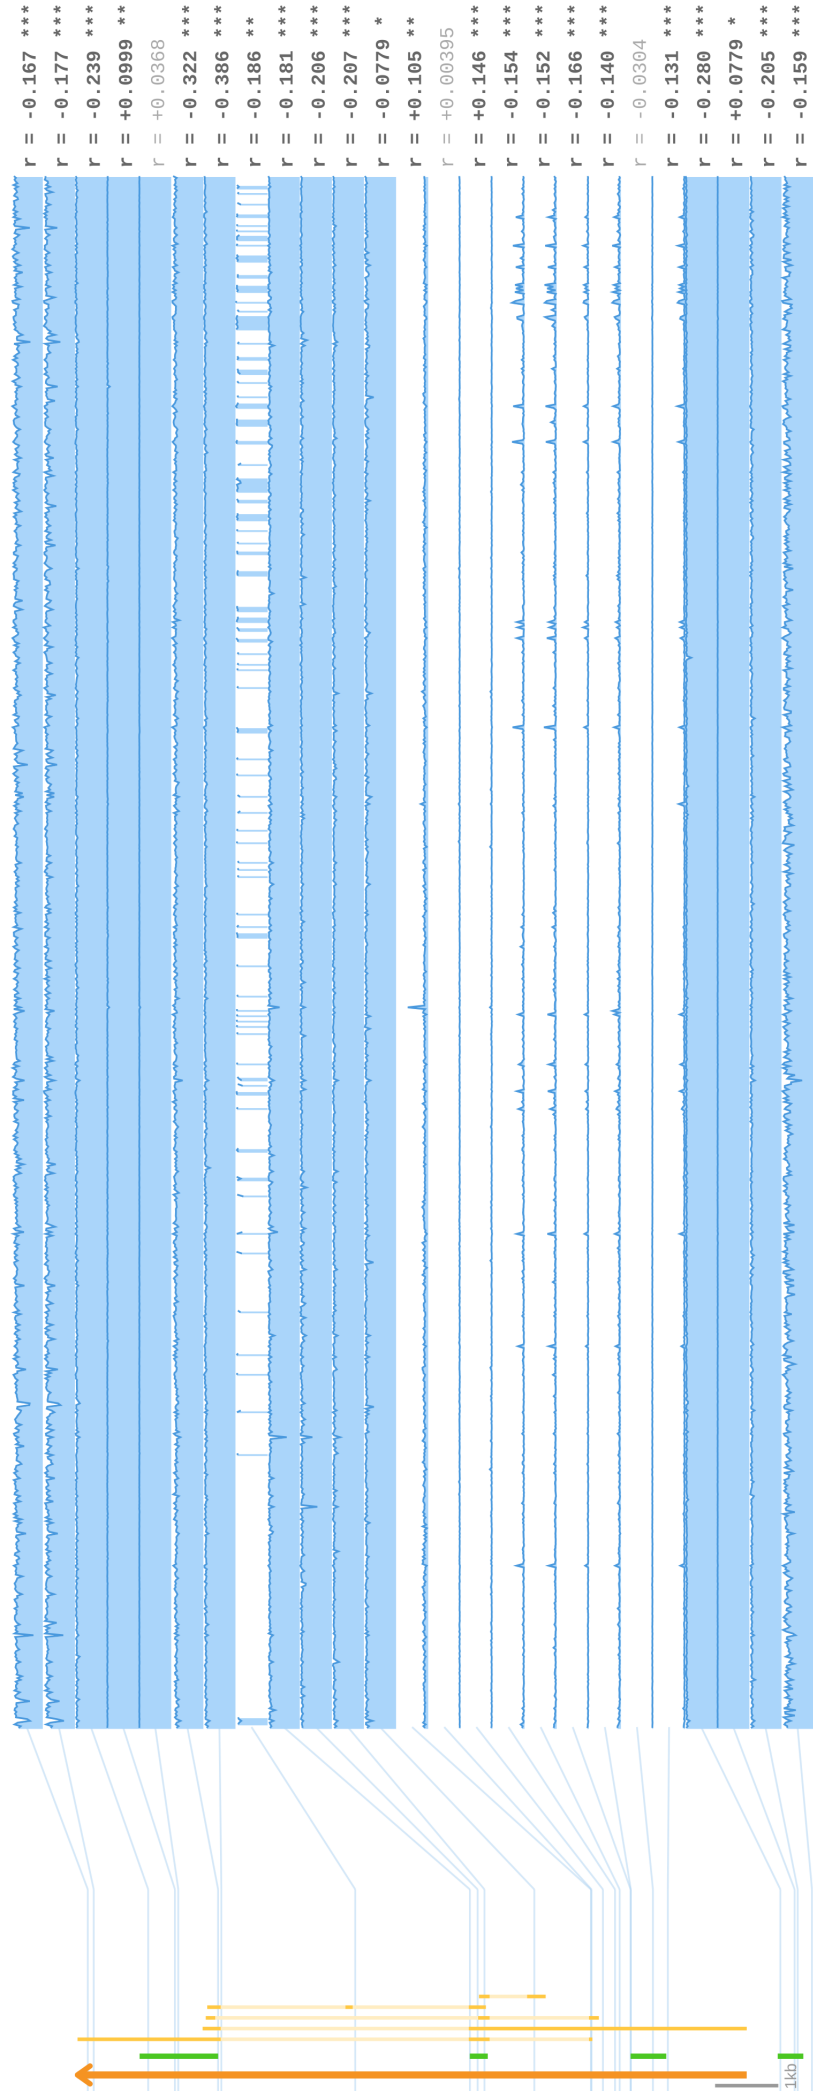

Supplement: Supplementary file [file 13533107]
